# Supplementary material for: Investing in health R&D: where we are, what limits us, and how to make progress in Africa
Source: PubMed Central journal article supplement (PMC6407556; doi:10.1136/bmjgh-2018-001047), 2019-03-04
Supplement: bmjgh-2018-001047supp001.pdf [file bmjgh-2018-001047supp001.pdf]

### **Additional File A**

File format – Word document .docx

Title: GDP per capita and GERD as % of GDP by African country in 2014 (or latest available year)

Description: Table detailing the GDP per capita, GERD as % of GDP and GERD per country in 2014 or latest available year.

Source: UNESCO Institute for Statistics [<http://uis.unesco.org>]

| <b>Country</b>           | <b>GDP per capita - PPP\$</b> | <b>GERD as % of GDP</b> | <b>GERD (PPP) millions</b> |
|--------------------------|-------------------------------|-------------------------|----------------------------|
| Algeria*                 | 14,687                        | 0.07                    | 242                        |
| Egypt\$\$\$              | 10,891                        | 0.68                    | 6,402                      |
| Libya                    | 14,154                        | -                       | -                          |
| Morocco∞∞                | 7,821                         | 0.71                    | 1,484                      |
| Tunisia\$\$\$            | 11,397                        | 0.64                    | 806                        |
| Angola∞∞∞                | 7,371                         | -                       | -                          |
| Benin                    | 2,110                         | -                       | -                          |
| Botswana\$               | 15,807                        | 0.25                    | 77                         |
| Burkina Faso∞            | 1,659                         | 0.2                     | 40                         |
| Burundi∞∞∞∞              | 736                           | 0.12                    | 8                          |
| Cabo Verde∞∞∞∞           | 6,690                         | 0.07                    | 2                          |
| Cameroon                 | 3,123                         | -                       | -                          |
| Central African Republic | 597                           | -                       | -                          |
| Chad                     | 2,171                         | -                       | -                          |
| Comoros                  | 1,435                         | -                       | -                          |
| Congo                    | 6,368                         | -                       | -                          |
| Cote d'Ivoire*           | 3,496                         | -                       | -                          |
| DRC∞                     | 783                           | 0.08                    | 28                         |
| Djibouti                 | 3,282                         | -                       | -                          |
| Equatorial Guinea        | 30,041                        | -                       | -                          |
| Eritrea                  | 1,411                         | -                       | -                          |
| Ethiopia\$\$             | 1,626                         | 0.6                     | 786                        |
| Gabon∞                   | 20,010                        | 0.57                    | 128                        |
| Gambia∞∞∞∞               | 1,636                         | 0.13                    | 4                          |
| Guinea                   | 1,207                         | -                       | -                          |
| Guinea-Bissau            | 1,453                         | -                       | -                          |
| Kenya∞∞                  | 3,083                         | 0.79                    | 788                        |
| Lesotho∞∞∞∞              | 2,648                         | 0.01                    | 1                          |
| Liberia                  | 836                           | -                       | -                          |
| Madagascar\$\$\$         | 1,459                         | 0.01                    | 5                          |
| Malawi∞∞                 | 1,183                         | 1.06                    | -                          |
| Mali∞∞                   | 2,428                         | 0.67                    | 153                        |
| Mauritania               | 3,886                         | -                       | -                          |
| Mauritius\$              | 19,480                        | 0.18                    | 39                         |

|                           |        |      |       |
|---------------------------|--------|------|-------|
| Mozambique $\infty\infty$ | 1,186  | 0.42 | 92    |
| Namibia $\infty\infty$    | 10,414 | 0.14 | 26    |
| Niger*                    | 954    | -    | -     |
| Nigeria**                 | 5,992  | 0.22 | 1,375 |
| Rwanda $\infty$           | 1,759  | -    | -     |
| Sao Tome and Principe     | 3,188  | -    | -     |
| Senegal $\infty\infty$    | 2,431  | 0.54 | 150   |
| Seychelles*               | 27,273 | 0.3  | 4     |
| Sierra Leone              | 1,591  | -    | -     |
| Somalia                   | -      | -    | -     |
| South Africa§             | 13,165 | 0.73 | 4,824 |
| South Sudan               | 1,850  | -    | -     |
| Sudan*                    | 4,173  | 0.3  | 281   |
| Swaziland                 | 8,427  | -    | -     |
| Togo§§§                   | 1,460  | 0.27 | 27    |
| Uganda $\infty\infty$     | 1,825  | 0.48 | 240   |
| Tanzania§§                | 2,667  | 0.53 | 623   |
| Zambia***                 | 3,853  | 0.28 | 101   |
| Zimbabwe§                 | 1,794  | -    | -     |

2005\*, 2007\*\*, 2008\*\*\*, 2009 $\infty$ , 2010 $\infty\infty$ , 2011 $\infty\infty\infty$ , 2012§, 2013§§, 2014§§§
