# Supplementary material for: Investing in health R&D: where we are, what limits us, and how to make progress in Africa
Source: PubMed Central journal article supplement (PMC6407556; doi:10.1136/bmjgh-2018-001047), 2019-03-04
Supplement: bmjgh-2018-001047supp002.pdf [file bmjgh-2018-001047supp002.pdf]

### **Additional File B**

File format – Word document.docx

Title: Research collaboration in African countries

Description: The level of research collaboration by country detailed by percentage of total research collaboration that takes place within the country, with countries outside Africa and with other countries within the African continent.

Source: Pouris A, Yuh-Shan, Ho.: Research emphasis and collaboration in Africa. *Scientometrics* 2014, 98:2169-2184.

| <b>Country</b> | <b>Single country (% of total)</b> | <b>Collaboration outside Africa (% of total)</b> | <b>Collaboration inside Africa (% of total)</b> |
|----------------|------------------------------------|--------------------------------------------------|-------------------------------------------------|
| South Africa   | 47                                 | 49                                               | 3.9                                             |
| Egypt          | 57                                 | 42                                               | 0.63                                            |
| Tunisia        | 50                                 | 48                                               | 1.3                                             |
| Nigeria        | 71                                 | 23                                               | 5.7                                             |
| Algeria        | 42                                 | 58                                               | 1.3                                             |
| Morocco        | 40                                 | 58                                               | 1.8                                             |
| Kenya          | 16                                 | 78                                               | 5.9                                             |
| Cameroon       | 21                                 | 70                                               | 9.3                                             |
| Uganda         | 15                                 | 79                                               | 5.7                                             |
| Tanzania       | 14                                 | 81                                               | 5.1                                             |
| Ethiopia       | 29                                 | 66                                               | 5                                               |
| Ghana          | 26                                 | 70                                               | 4.8                                             |
| Senegal        | 16                                 | 76                                               | 8                                               |
| Sudan          | 31                                 | 65                                               | 4                                               |
| Malawi         | 14                                 | 76                                               | 10                                              |
| Burkina Faso   | 8.5                                | 83                                               | 8.5                                             |
| Zimbabwe       | 16                                 | 66                                               | 18                                              |
| Cote d'Ivoire  | 29                                 | 68                                               | 3.7                                             |
| Benin          | 13                                 | 78                                               | 10                                              |

|               |     |    |     |
|---------------|-----|----|-----|
| Madagascar    | 8.7 | 90 | 1.4 |
| Zambia        | 5.5 | 89 | 5.4 |
| Botswana      | 26  | 54 | 19  |
| Libya         | 29  | 61 | 10  |
| Mali          | 5.9 | 89 | 5   |
| Mozambique    | 4.3 | 89 | 6.9 |
| Gabon         | 3.7 | 92 | 4.2 |
| Congo         | 7.6 | 84 | 8.6 |
| Gambia        | 5.5 | 93 | 1.6 |
| Niger         | 7.5 | 76 | 16  |
| Namibia       | 11  | 75 | 14  |
| DRC           | 6.5 | 89 | 4.5 |
| Rwanda        | 5.5 | 85 | 9.1 |
| Mauritius     | 36  | 60 | 4   |
| Togo          | 23  | 67 | 10  |
| Swaziland     | 19  | 52 | 29  |
| Angola        | 3.4 | 91 | 5.2 |
| Seychelles    | 3.6 | 95 | 1.8 |
| Guinea Bissau | 1.8 | 98 | 0   |
| Guinea        | 3.7 | 91 | 5.5 |
| CAD           | 6.7 | 83 | 10  |
| Mauritania    | 4.7 | 66 | 29  |
| Eritrea       | 9.3 | 90 | 1.2 |
| Lesotho       | 8.4 | 54 | 37  |
| Sierra Leone  | 10  | 80 | 10  |
| Chad          | 6.8 | 82 | 11  |

|                          |     |     |     |
|--------------------------|-----|-----|-----|
| Burundi                  | 1.5 | 96  | 3   |
| Cape Verde               | 0   | 100 | 0   |
| Djibouti                 | 12  | 85  | 3.8 |
| Liberia                  | 0   | 96  | 4.3 |
| Comoros                  | 0   | 80  | 20  |
| Equatorial Guinea        | 0   | 100 | 0   |
| Somalia                  | 0   | 75  | 25  |
| Sao Tome and<br>Principe | 0   | 100 | 0   |
